# Supplementary material
Source: PubMed Central journal article supplement (PMC2573087)
Supplement: supp_283_44_29639__1.pdf [file supp_283_44_29639__1.pdf]

## Charles G. Glabe

---

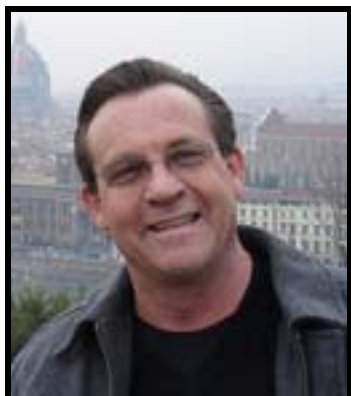

**Current Position:** Professor of Molecular Biology and Biochemistry at University of California, Davis

**Education:** Ph.D. in Cell and Developmental Biology (1978) from University of California, Davis

**Non-scientific Interests:** Travel, outdoor activities, and classic automobiles

My research focuses on the structure, aggregation and mechanisms of pathogenesis of amyloids in degenerative diseases. The main research programs center on the production of conformation dependent antibodies that specifically recognize distinct assembly states of amyloids, the use of these antibodies in dissecting the pathogenic mechanisms of amyloids, and their applications in vaccine development. Other areas of interest include the mechanisms of membrane permeabilization by amyloid oligomers. I became interested in this amyloid aggregation and structure by accident in 1988, when I agreed to make a synthetic peptide for a colleague. This peptide was A $\beta$ 42, which is believed to be a causative agent in Alzheimer disease.

---

**Read Dr. Glabe's article entitled:** Structural Classification of Toxic Amyloid Oligomers

<http://www.jbc.org/cgi/content/full/283/44/29639>
